# Supplementary material for: Proteomic Profile Distinguishes New Subpopulations of Breast Cancer Patients with Different Survival Outcomes
Source: MDPI journal article supplement (doi:10.3390/cancers15174230), 2023-08-24
Supplement: s1 [file s1]

# Proteomic Profile Distinguishes New Subpopulations of Breast Cancer Patients with Different Survival Outcomes

Joanna Tobiasz <sup>1,2</sup> and Joanna Polanska <sup>1,\*</sup>

<sup>1</sup> Department of Data Science and Engineering, Silesian University of Technology, 44-100 Gliwice, Poland; joanna.tobiasz@polsl.pl

<sup>2</sup> Department of Computer Graphics, Vision and Digital Systems, Silesian University of Technology, 44-100 Gliwice, Poland

\* Correspondence: joanna.polanska@polsl.pl

## Supplementary Materials

**Table S1.** The list of 86 proteins selected with the Gaussian-mixture-model-based feature filtration.

| Selected proteins         |
|---------------------------|
| 14-3-3_zeta-R-V           |
| 4E-BP1-R-V                |
| 4E-BP1_pT37_T46-R-V       |
| ACC_pS79-R-V              |
| ADAR1-M-V                 |
| Akt-R-V                   |
| Akt_pS473-R-V             |
| Akt_pT308-R-V             |
| AMPK_pT172-R-V            |
| Annexin-1-M-E             |
| AR-R-V                    |
| ASNS-R-V                  |
| Bcl-2-M-V                 |
| Bcl2A1-R-V                |
| beta-Catenin-R-V          |
| Bim-R-V                   |
| B-Raf_pS445-R-V           |
| BRD4-R-V                  |
| Caspase-7_cleavedD198-R-C |
| Caveolin-1-R-V            |
| CD31-M-V                  |
| CDK1_pY15-R-C             |
| c-Kit-R-V                 |
| Claudin-7-R-V             |
| c-Myc-R-C                 |
| COG3-R-V                  |
| Collagen_VI-R-V           |

| Selected proteins           |
|-----------------------------|
| Cyclin_B1-R-V               |
| Cyclin_D1-R-V               |
| Cyclin_E1-M-V               |
| DUSP4-R-V                   |
| E-Cadherin-R-V              |
| eEF2K-R-V                   |
| EGFR_pY1068-R-C             |
| eIF4G-R-C                   |
| ER-alpha-R-V                |
| ER-alpha_pS118-R-V          |
| ERK2-R-E                    |
| FASN-R-V                    |
| Fibronectin-R-V             |
| FoxM1-R-V                   |
| G6PD-M-V                    |
| GAB2-R-V                    |
| GAPDH-M-C                   |
| GATA3-M-V                   |
| GSK3-alpha-beta-M-V         |
| GSK3-alpha-beta_pS21_S9-R-V |
| GSK3_pS9-R-V                |
| HER2-M-V                    |
| HSP70-R-C                   |
| IGFBP2-R-V                  |
| Ku80-R-C                    |
| Lck-R-V                     |
| MAPK_pT202_Y204-R-V         |
| MEK1-R-V                    |
| mTOR-R-V                    |
| MYH11-R-V                   |
| Myosin-IIa_pS1943-R-V       |
| NDRG1_pT346-R-V             |
| NF-kB-p65_pS536-R-C         |
| p16_INK4a-R-V               |
| p27-R-V                     |
| p38_pT180_Y182-R-V          |
| p70S6K-R-V                  |
| PDCD4-R-C                   |
| PKC-pan_BetaII_pS660-R-V    |
| PR-R-V                      |
| PREX1-R-E                   |
| PTEN-R-V                    |
| Rab25-R-V                   |
| RBM15-R-V                   |

| Selected proteins |
|-------------------|
| Rb_pS807_S811-R-V |
| Rictor-R-C        |
| S6-R-E            |
| S6_pS235_S236-R-V |
| S6_pS240_S244-R-V |
| SCD-M-V           |
| SHP-2_pY542-R-C   |
| Smac-M-E          |
| Src_pY416-R-C     |
| Src_pY527-R-V     |
| STAT3_pY705-R-V   |
| STAT5-alpha-R-V   |
| Syk-M-V           |
| TFRC-R-V          |
| TSC1-R-C          |

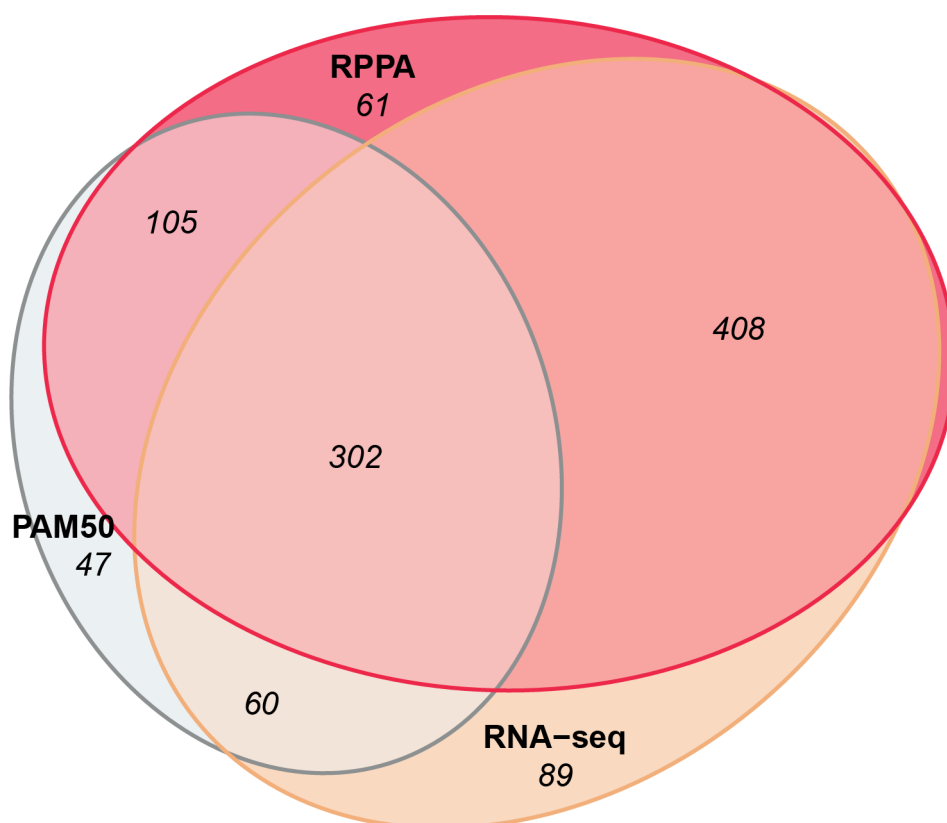

**Figure S1.** The overlapping of patients between the data sets of all available PAM50 labels, protein levels measured with Reverse Phase Protein Arrays (RPPA), and RNA sequencing measurements used by Tobiasz et al. [30].

**Table S2.** Number and percentage of patients in proteomics-based subpopulations referred to clusters obtained based on the RNA sequencing results [30].

| RNA-seq-based cluster | Proteomics-based subpopulation |                 |                 |                 |                 |                 | TOTAL            |
|-----------------------|--------------------------------|-----------------|-----------------|-----------------|-----------------|-----------------|------------------|
|                       | Basal                          | HER2-enriched   | Luminal         |                 |                 |                 |                  |
|                       |                                |                 | A1              | A2              | A3              | B               |                  |
| 1                     | 0<br>(0.00%)                   | 3<br>(9.38%)    | 5<br>(13.51%)   | 21<br>(50.00%)  | 11<br>(16.42%)  | 12<br>(22.22%)  | 52<br>(17.22%)   |
| 2                     | 63<br>(90.00%)                 | 0<br>(0.00%)    | 3<br>(8.11%)    | 0<br>(0.00%)    | 0<br>(0.00%)    | 0<br>(0.00%)    | 66<br>(21.85%)   |
| 3                     | 7<br>(10.00%)                  | 22<br>(68.75%)  | 3<br>(8.11%)    | 0<br>(0.00%)    | 4<br>(5.97%)    | 4<br>(7.41%)    | 40<br>(13.25%)   |
| 4                     | 0<br>(0.00%)                   | 2<br>(6.25%)    | 6<br>(16.22%)   | 5<br>(11.90%)   | 13<br>(19.40%)  | 31<br>(57.41%)  | 57<br>(18.87%)   |
| 5                     | 0<br>(0.00%)                   | 5<br>(15.62%)   | 20<br>(54.05%)  | 16<br>(38.10%)  | 39<br>(58.21%)  | 7<br>(12.96%)   | 87<br>(28.81%)   |
| TOTAL                 | 70<br>(100.00%)                | 32<br>(100.00%) | 37<br>(100.00%) | 42<br>(100.00%) | 67<br>(100.00%) | 54<br>(100.00%) | 302<br>(100.00%) |

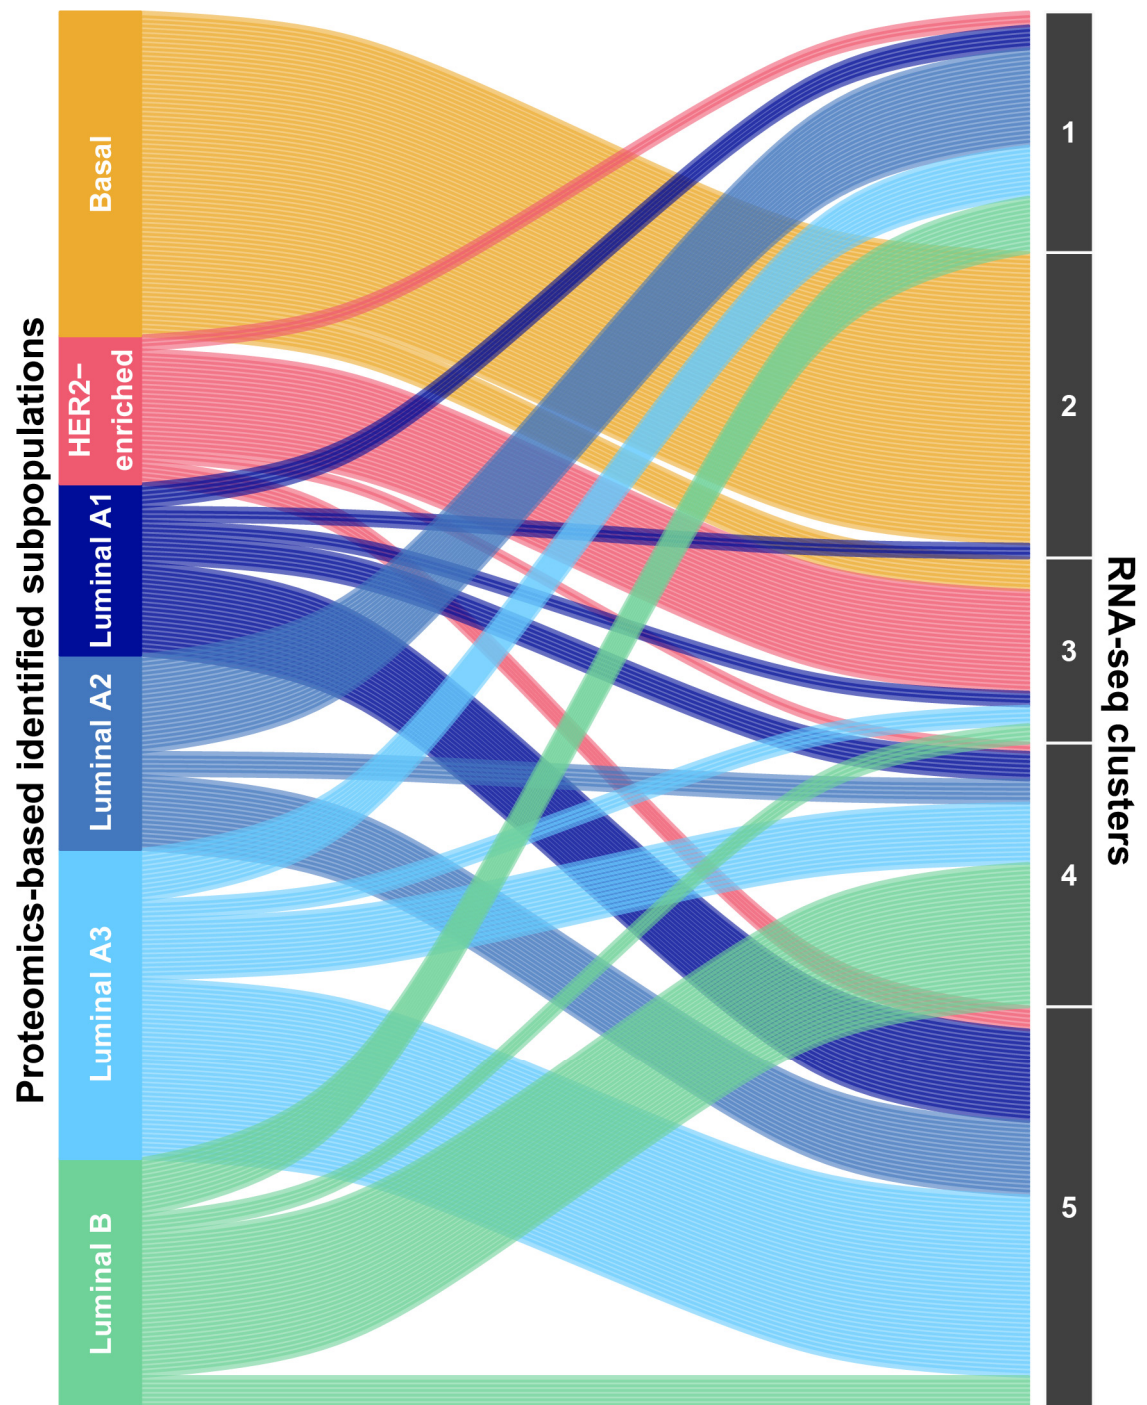

**Figure S2.** Proteomics-based subpopulations related to clusters obtained based on the RNA sequencing results [30].

**Table S3.** Number and percentage of patients in clusters obtained based on the RNA sequencing results [30] referred to PAM50 subtypes.

| PAM50 subtype        | RNA-seq-based cluster  |                        |                        |                        |                        |
|----------------------|------------------------|------------------------|------------------------|------------------------|------------------------|
|                      | 1                      | 2                      | 3                      | 4                      | 5                      |
| <b>Basal</b>         | <b>1</b><br>(1.92%)    | <b>65</b><br>(98.48%)  | <b>2</b><br>(5.00%)    | <b>1</b><br>(1.75%)    | <b>1</b><br>(1.15%)    |
| <b>HER2-enriched</b> | <b>4</b><br>(7.69%)    | <b>0</b><br>(0.00%)    | <b>24</b><br>(60.00%)  | <b>0</b><br>(0.00%)    | <b>3</b><br>(3.45%)    |
| <b>Luminal A</b>     | <b>32</b><br>(61.54%)  | <b>1</b><br>(1.52%)    | <b>6</b><br>(15.00%)   | <b>24</b><br>(42.11%)  | <b>74</b><br>(85.06%)  |
| <b>Luminal B</b>     | <b>15</b><br>(28.85%)  | <b>0</b><br>(0.00%)    | <b>8</b><br>(20.00%)   | <b>32</b><br>(56.14%)  | <b>9</b><br>(10.34%)   |
| <b>TOTAL</b>         | <b>52</b><br>(100.00%) | <b>66</b><br>(100.00%) | <b>40</b><br>(100.00%) | <b>57</b><br>(100.00%) | <b>87</b><br>(100.00%) |

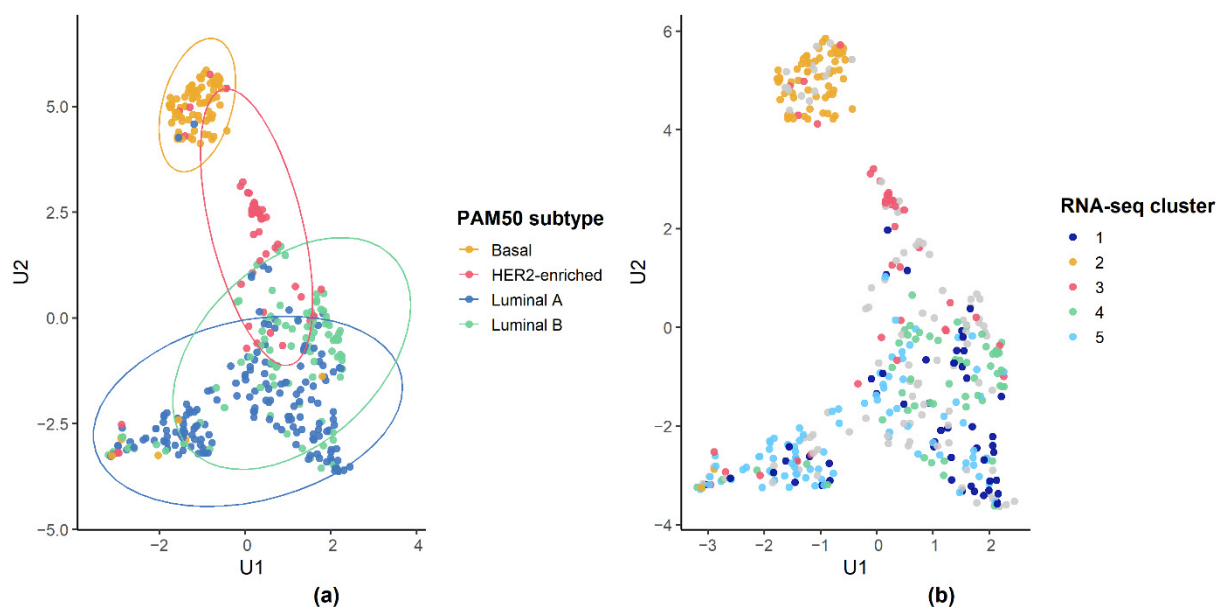

**Figure S3.** Protein-level-based UMAP visualization with data points colored with regard to breast cancer subtypes. (a) Breast cancer subtypes obtained with the PAM50 transcriptomic-based predictor. (b) Breast cancer patients' subtypes resulting from clustering of RNA sequencing results [30].

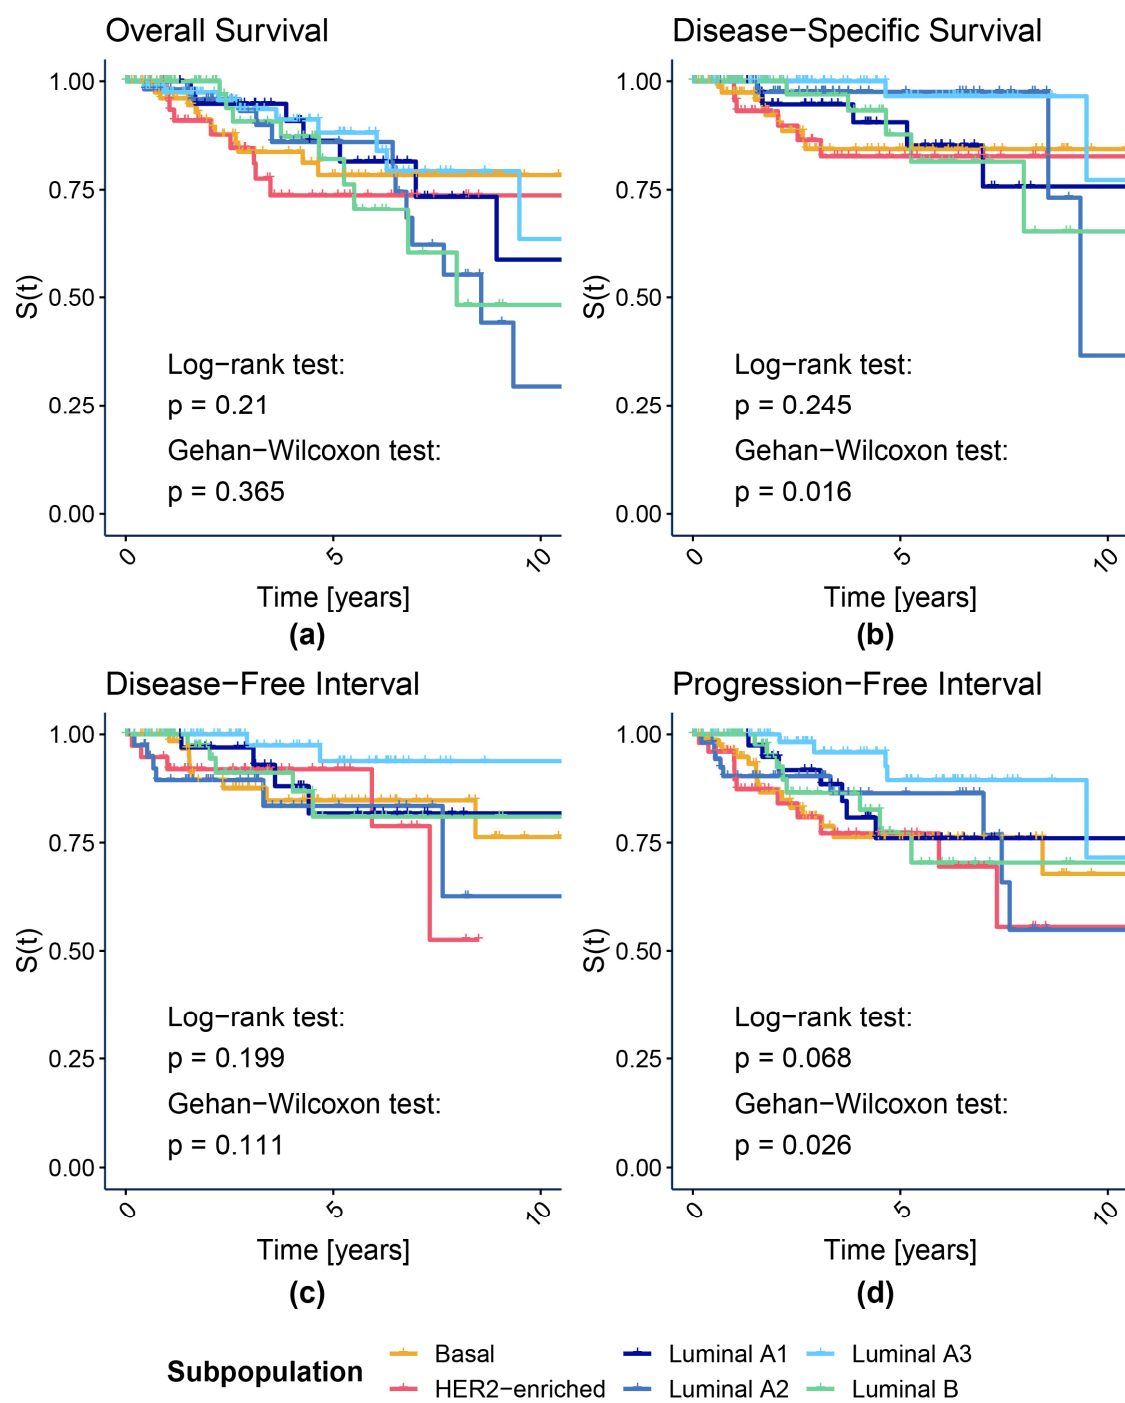

**Figure S4.** Kaplan-Meier survival curves of all subpopulations identified with k-means clustering of protein levels. (a) Overall Survival; (b) Disease-Specific Survival; (c) Disease-Free Interval; (d) Progression-Free Interval.

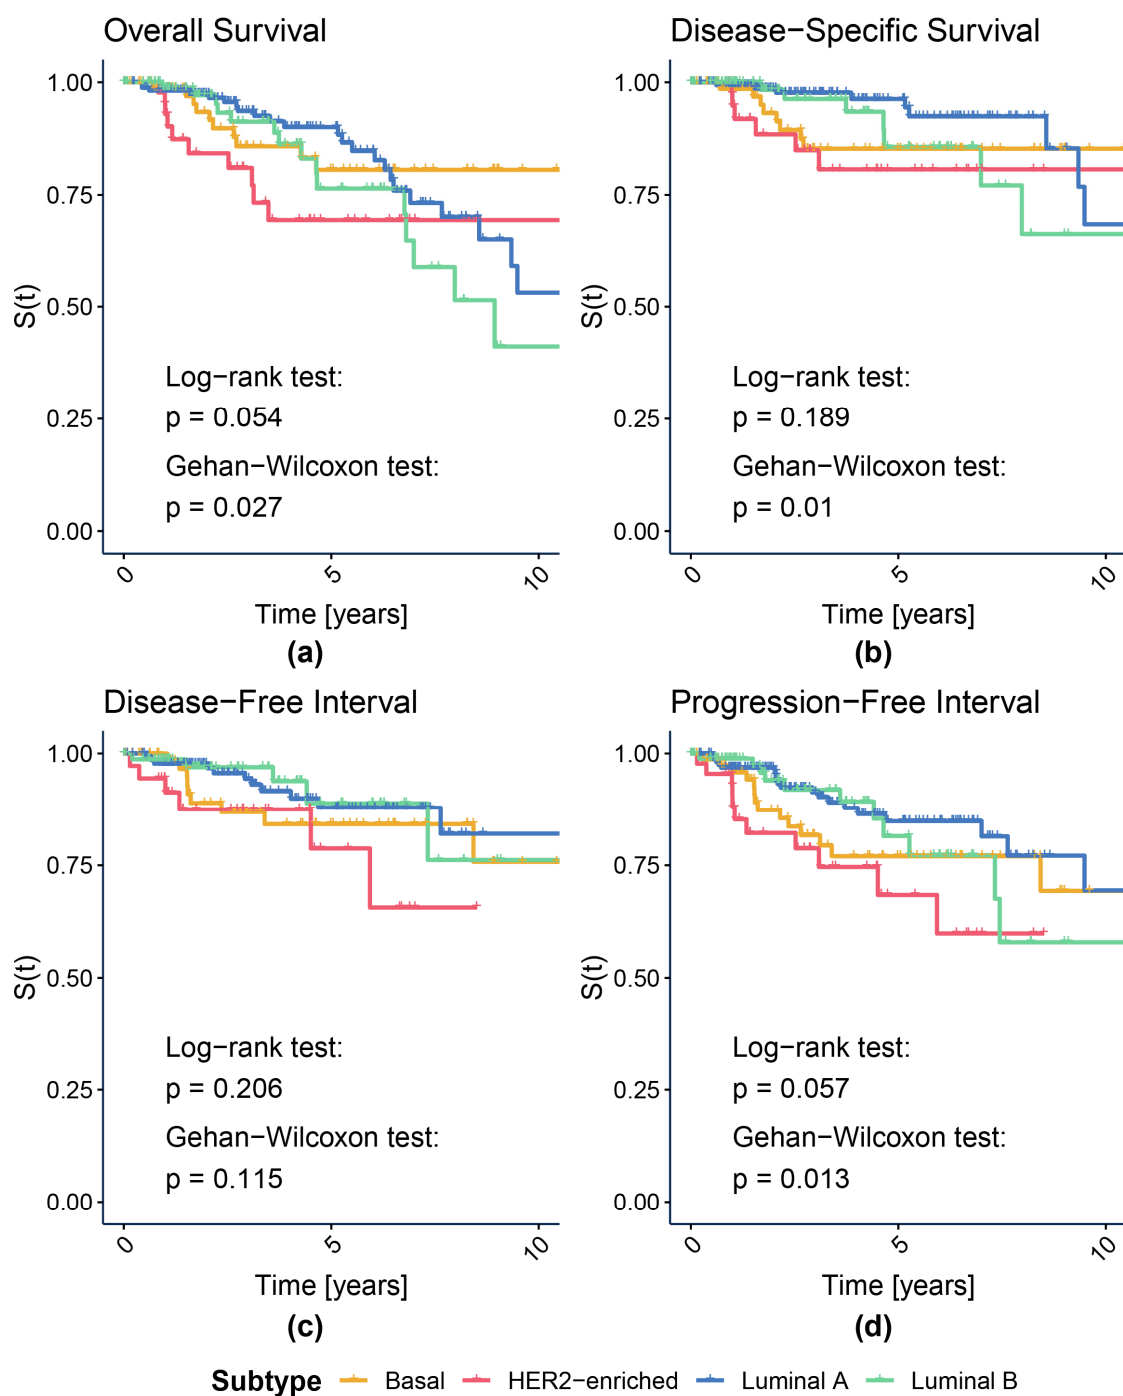

**Figure S5.** Kaplan-Meier survival curves of all PAM50 subtypes. (a) Overall Survival; (b) Disease-Specific Survival; (c) Disease-Free Interval; (d) Progression-Free Interval.



**Table S4.** Results of log-rank and Gehan-Wilcoxon tests for luminal subtypes identified with k-means clustering or PAM50 classifier.

| Endpoint type                          | $\chi^2$      |                     | p-value       |                     |
|----------------------------------------|---------------|---------------------|---------------|---------------------|
|                                        | Log-rank test | Gehan-Wilcoxon test | Log-rank test | Gehan-Wilcoxon test |
| <b>Proteomics-based subpopulations</b> |               |                     |               |                     |
| Overall Survival                       | 4.99          | 0.68                | 0.1724        | 0.8788              |
| Disease-Specific Survival              | 4.06          | 5.08                | 0.2552        | 0.1661              |
| Disease-Free Interval                  | 6.97          | 9.12                | 0.0730        | 0.0277              |
| Progression-Free Interval              | 4.87          | 6.41                | 0.1818        | 0.0932              |
| <b>PAM50-based subtypes</b>            |               |                     |               |                     |
| Overall Survival                       | 2.32          | 0.57                | 0.1280        | 0.4521              |
| Disease-Specific Survival              | 3.01          | 0.70                | 0.0828        | 0.4043              |
| Disease-Free Interval                  | 0.01          | 0.10                | 0.9333        | 0.7488              |
| Progression-Free Interval              | 0.56          | 0.003               | 0.4530        | 0.9512              |

**Table S5.** Results of log-rank and Gehan-Wilcoxon tests for all subtypes identified with k-means clustering or PAM50 classifier.

| Endpoint type                          | $\chi^2$      |                     | p-value       |                     |
|----------------------------------------|---------------|---------------------|---------------|---------------------|
|                                        | Log-rank test | Gehan-Wilcoxon test | Log-rank test | Gehan-Wilcoxon test |
| <b>Proteomics-based subpopulations</b> |               |                     |               |                     |
| Overall Survival                       | : 148         | 8177                | 3153<<        | 31697;              |
| Disease-Specific Survival              | 919<          | 461<7               | 31577:        | 313493              |
| Disease-Free Interval                  | : 164         | ; 1<9               | 314<;9        | 31443;              |
| Progression-Free Interval              | 4315;         | 451: 3              | 3139::        | 313597              |
| <b>PAM50-based subtypes</b>            |               |                     |               |                     |
| Overall Survival                       | : 199         | <14;                | 313869        | 3135: 3             |
| Disease-Specific Survival              | 71: ;         | 4415:               | 314;; ;       | 313436              |
| Disease-Free Interval                  | 718:          | 81<6                | 315393        | 314486              |
| Progression-Free Interval              | : 185         | 431: 5              | 3138: 4       | 313466              |

**Table S6.** Cox proportional hazard analysis of all identified subpopulations.

| Subpo-<br>pulation        | N  | N <sub>e</sub> | N <sub>c</sub> | HR        | HR<br>effect | HR allocation adjusted critical value |                                    |                                |
|---------------------------|----|----------------|----------------|-----------|--------------|---------------------------------------|------------------------------------|--------------------------------|
|                           |    |                |                |           |              | $\alpha = 0.1$<br>small effect        | $\alpha = 0.3$<br>medium<br>effect | $\alpha = 0.5$<br>large effect |
| Overall Survival          |    |                |                |           |              |                                       |                                    |                                |
| Basal                     | 89 | 13             | 76             | Reference |              |                                       |                                    |                                |
| HER2-<br>enriched         | 54 | 11             | 43             | 1.836     | Small        | HR < 0.773;<br>HR > 1.294             | HR < 0.468;<br>HR > 2.135          | HR < 0.274;<br>HR > 3.648      |
| Luminal<br>A1             | 44 | 8              | 36             | 1.050     | No<br>effect | HR < 0.749;<br>HR > 1.336             | HR < 0.436;<br>HR > 2.295          | HR < 0.249;<br>HR > 4.023      |
| Luminal<br>A2             | 61 | 14             | 47             | 2.016     | Small        | HR < 0.785;<br>HR > 1.273             | HR < 0.487;<br>HR > 2.054          | HR < 0.289;<br>HR > 3.459      |
| Luminal<br>A3             | 87 | 9              | 78             | 0.837     | No<br>effect | HR < 0.816;<br>HR > 1.225             | HR < 0.536;<br>HR > 1.867          | HR < 0.331;<br>HR > 3.023      |
| Luminal<br>B              | 72 | 9              | 63             | 1.445     | Small        | HR < 0.801;<br>HR > 1.248             | HR < 0.511;<br>HR > 1.958          | HR < 0.309;<br>HR > 3.236      |
| Disease-Specific Survival |    |                |                |           |              |                                       |                                    |                                |
| Basal                     | 87 | 9              | 78             | Reference |              |                                       |                                    |                                |
| HER2-<br>enriched         | 52 | 7              | 45             | 1.579     | Small        | HR < 0.771;<br>HR > 1.297             | HR < 0.466;<br>HR > 2.146          | HR < 0.272;<br>HR > 3.673      |
| Luminal<br>A1             | 43 | 5              | 38             | 0.957     | No<br>effect | HR < 0.749;<br>HR > 1.336             | HR < 0.436;<br>HR > 2.296          | HR < 0.249;<br>HR > 4.023      |
| Luminal<br>A2             | 58 | 4              | 54             | 0.817     | No<br>effect | HR < 0.783;<br>HR > 1.278             | HR < 0.483;<br>HR > 2.071          | HR < 0.286;<br>HR > 3.5        |
| Luminal<br>A3             | 85 | 2              | 83             | 0.241     | Large        | HR < 0.816;<br>HR > 1.225             | HR < 0.536;<br>HR > 1.867          | HR < 0.331;<br>HR > 3.024      |
| Luminal<br>B              | 72 | 5              | 67             | 1.002     | No<br>effect | HR < 0.803;<br>HR > 1.245             | HR < 0.514;<br>HR > 1.946          | HR < 0.312;<br>HR > 3.208      |
| Disease-Free Interval     |    |                |                |           |              |                                       |                                    |                                |
| Basal                     | 79 | 9              | 70             | Reference |              |                                       |                                    |                                |
| HER2-<br>enriched         | 41 | 5              | 36             | 1.315     | No<br>effect | HR < 0.755;<br>HR > 1.325             | HR < 0.444;<br>HR > 2.254          | HR < 0.255;<br>HR > 3.927      |
| Luminal<br>A1             | 38 | 4              | 34             | 0.819     | No<br>effect | HR < 0.745;<br>HR > 1.342             | HR < 0.431;<br>HR > 2.32           | HR < 0.245;<br>HR > 4.079      |
| Luminal<br>A2             | 46 | 6              | 40             | 1.516     | Small        | HR < 0.768;<br>HR > 1.302             | HR < 0.462;<br>HR > 2.165          | HR < 0.269;<br>HR > 3.717      |
| Luminal<br>A3             | 79 | 2              | 77             | 0.225     | Large        | HR < 0.818;<br>HR > 1.222             | HR < 0.538;<br>HR > 1.857          | HR < 0.333;<br>HR > 3          |
| Luminal<br>B              | 64 | 5              | 59             | 0.884     | No<br>effect | HR < 0.801;<br>HR > 1.248             | HR < 0.511;<br>HR > 1.958          | HR < 0.309;<br>HR > 3.234      |
| Progression-Free Interval |    |                |                |           |              |                                       |                                    |                                |
| Basal                     | 89 | 15             | 74             | Reference |              |                                       |                                    |                                |
| HER2-<br>enriched         | 54 | 12             | 42             | 1.483     | Small        | HR < 0.773;<br>HR > 1.294             | HR < 0.468;<br>HR > 2.135          | HR < 0.274;<br>HR > 3.648      |
| Luminal<br>A1             | 44 | 7              | 37             | 0.738     | Small        | HR < 0.749;<br>HR > 1.336             | HR < 0.436;<br>HR > 2.295          | HR < 0.249;<br>HR > 4.023      |

| Subpopulation | N  | N <sub>e</sub> | N <sub>c</sub> | HR    | HR effect | HR allocation adjusted critical value |                                 |                                |
|---------------|----|----------------|----------------|-------|-----------|---------------------------------------|---------------------------------|--------------------------------|
|               |    |                |                |       |           | $\alpha = 0.1$<br>small effect        | $\alpha = 0.3$<br>medium effect | $\alpha = 0.5$<br>large effect |
| Luminal A2    | 61 | 9              | 52             | 0.965 | No effect | HR < 0.785;<br>HR > 1.273             | HR < 0.487;<br>HR > 2.054       | HR < 0.289;<br>HR > 3.459      |
| Luminal A3    | 87 | 5              | 82             | 0.308 | Large     | HR < 0.816;<br>HR > 1.225             | HR < 0.536;<br>HR > 1.867       | HR < 0.331;<br>HR > 3.023      |
| Luminal B     | 72 | 8              | 64             | 0.846 | No effect | HR < 0.801;<br>HR > 1.248             | HR < 0.511;<br>HR > 1.958       | HR < 0.309;<br>HR > 3.236      |

Table S7. Cox proportional hazard analysis of all PAM50 subtypes.

| PAM50 subtype             | N   | N <sub>e</sub> | N <sub>c</sub> | HR        | HR effect | HR allocation adjusted critical value |                                 |                                |
|---------------------------|-----|----------------|----------------|-----------|-----------|---------------------------------------|---------------------------------|--------------------------------|
|                           |     |                |                |           |           | $\alpha = 0.1$<br>small effect        | $\alpha = 0.3$<br>medium effect | $\alpha = 0.5$<br>large effect |
| Overall Survival          |     |                |                |           |           |                                       |                                 |                                |
| Basal                     | 86  | 11             | 75             | Reference |           |                                       |                                 |                                |
| HER2                      | 50  | 11             | 39             | 2.830     | Medium    | HR < 0.768;<br>HR > 1.302             | HR < 0.462;<br>HR > 2.166       | HR < 0.269;<br>HR > 3.72       |
| LumA                      | 173 | 26             | 147            | 1.408     | Small     | HR < 0.857;<br>HR > 1.166             | HR < 0.609;<br>HR > 1.642       | HR < 0.4;<br>HR > 2.497        |
| LumB                      | 98  | 16             | 82             | 2.137     | Medium    | HR < 0.827;<br>HR > 1.209             | HR < 0.554;<br>HR > 1.805       | HR < 0.348;<br>HR > 2.878      |
| Disease-Specific Survival |     |                |                |           |           |                                       |                                 |                                |
| Basal                     | 84  | 8              | 76             | Reference |           |                                       |                                 |                                |
| HER2                      | 48  | 6              | 42             | 1.977     | Small     | HR < 0.766;<br>HR > 1.306             | HR < 0.459;<br>HR > 2.179       | HR < 0.267;<br>HR > 3.75       |
| LumA                      | 169 | 10             | 159            | 0.691     | Small     | HR < 0.857;<br>HR > 1.166             | HR < 0.609;<br>HR > 1.642       | HR < 0.4;<br>HR > 2.497        |
| LumB                      | 96  | 8              | 88             | 1.326     | Small     | HR < 0.828;<br>HR > 1.208             | HR < 0.554;<br>HR > 1.804       | HR < 0.348;<br>HR > 2.875      |
| Disease-Free Interval     |     |                |                |           |           |                                       |                                 |                                |
| Basal                     | 76  | 9              | 67             | Reference |           |                                       |                                 |                                |
| HER2                      | 42  | 6              | 36             | 1.723     | Small     | HR < 0.762;<br>HR > 1.312             | HR < 0.454;<br>HR > 2.204       | HR < 0.262;<br>HR > 3.81       |
| LumA                      | 147 | 11             | 136            | 0.664     | Small     | HR < 0.856;<br>HR > 1.169             | HR < 0.606;<br>HR > 1.65        | HR < 0.397;<br>HR > 2.517      |
| LumB                      | 82  | 5              | 77             | 0.624     | Small     | HR < 0.824;<br>HR > 1.214             | HR < 0.548;<br>HR > 1.826       | HR < 0.342;<br>HR > 2.927      |
| Progression-Free Interval |     |                |                |           |           |                                       |                                 |                                |
| Basal                     | 86  | 14             | 72             | Reference |           |                                       |                                 |                                |
| HER2                      | 50  | 11             | 39             | 1.840     | Small     | HR < 0.768;<br>HR > 1.302             | HR < 0.462;<br>HR > 2.166       | HR < 0.269;<br>HR > 3.72       |
| LumA                      | 173 | 20             | 153            | 0.679     | Small     | HR < 0.857;<br>HR > 1.166             | HR < 0.609;<br>HR > 1.642       | HR < 0.4;<br>HR > 2.497        |
| LumB                      | 98  | 11             | 87             | 0.858     | No effect | HR < 0.827;                           | HR < 0.554;                     | HR < 0.348;                    |

| PAM50 subtype | N | N <sub>e</sub> | N <sub>c</sub> | HR | HR effect | HR allocation adjusted critical value |                                 |                                |
|---------------|---|----------------|----------------|----|-----------|---------------------------------------|---------------------------------|--------------------------------|
|               |   |                |                |    |           | $\alpha = 0.1$<br>small effect        | $\alpha = 0.3$<br>medium effect | $\alpha = 0.5$<br>large effect |
|               |   |                |                |    |           | HR > 1.209                            | HR > 1.805                      | HR > 2.878                     |

“HER2” denotes HER2-enriched subtype, “LumA” luminal A subtype, and “LumB” luminal B subtype.

**Table S8.** Results of log-rank and Gehan-Wilcoxon tests for pairwise comparisons of luminal subpopulations identified with k-means clustering.

| Comparison                       | $\chi^2$      |                     | p-value       |                     |
|----------------------------------|---------------|---------------------|---------------|---------------------|
|                                  | Log-rank test | Gehan-Wilcoxon test | Log-rank test | Gehan-Wilcoxon test |
| <b>Overall Survival</b>          |               |                     |               |                     |
| A1 versus A3                     | 0.37          | 0.04                | 0.5432        | 0.8430              |
| A2 versus A3                     | 3.80          | 0.43                | 0.0511        | 0.5138              |
| B versus A3                      | 1.38          | 0.10                | 0.2395        | 0.7578              |
| A2 versus A1                     | 2.93          | 0.61                | 0.0872        | 0.4358              |
| B versus A1                      | 0.54          | 0.10                | 0.4629        | 0.7518              |
| A2 versus B                      | 0.15          | 0.09                | 0.7020        | 0.7632              |
| <b>Disease-Specific Survival</b> |               |                     |               |                     |
| A1 versus A3                     | 2.83          | 4.70                | 0.0925        | 0.0302              |
| A2 versus A3                     | 4.04          | 1.23                | 0.0444        | 0.2670              |
| B versus A3                      | 3.84          | 4.10                | 0.0499        | 0.0428              |
| A2 versus A1                     | 0.00          | 0.93                | 0.9867        | 0.3337              |
| B versus A1                      | 0.00          | 0.25                | 0.9812        | 0.6187              |
| A2 versus B                      | 0.23          | 0.43                | 0.6334        | 0.5104              |
| <b>Disease-Free Interval</b>     |               |                     |               |                     |
| A1 versus A3                     | 2.59          | 3.02                | 0.1074        | 0.0824              |
| A2 versus A3                     | 6.74          | 7.52                | 0.0094        | 0.0061              |
| B versus A3                      | 3.59          | 4.35                | 0.0583        | 0.0370              |
| A2 versus A1                     | 0.85          | 1.34                | 0.3567        | 0.2474              |
| B versus A1                      | 0.02          | 0.04                | 0.8937        | 0.8359              |
| A2 versus B                      | 0.86          | 2.18                | 0.3525        | 0.1398              |
| <b>Progression-Free Interval</b> |               |                     |               |                     |
| A1 versus A3                     | 2.28          | 4.18                | 0.1313        | 0.0409              |
| A2 versus A3                     | 4.30          | 5.41                | 0.0382        | 0.0201              |
| B versus A3                      | 4.24          | 5.36                | 0.0394        | 0.0207              |
| A2 versus A1                     | 0.17          | 0.22                | 0.6803        | 0.6363              |
| B versus A1                      | 0.04          | 0.01                | 0.8333        | 0.9235              |
| A2 versus B                      | 0.01          | 0.62                | 0.9033        | 0.4297              |

**Table S9.** Cox proportional hazard pairwise analysis of luminal subpopulations identified with k-means clustering.

| Compari-<br>son           | Subpo-<br>pulation | N  | N <sub>e</sub> | N <sub>c</sub> | HR        | HR<br>effect | HR allocation adjusted critical value |                           |                           |
|---------------------------|--------------------|----|----------------|----------------|-----------|--------------|---------------------------------------|---------------------------|---------------------------|
|                           |                    |    |                |                |           |              | α = 0.1                               | α = 0.3                   | α = 0.5                   |
|                           |                    |    |                |                |           |              | small<br>effect                       | medium<br>effect          | large effect              |
| Overall Survival          |                    |    |                |                |           |              |                                       |                           |                           |
| A1 vs A3                  | A1                 | 44 | 8              | 36             | 1.344     | Small        | HR < 0.751;<br>HR > 1.331             | HR < 0.439;<br>HR > 2.276 | HR < 0.251;<br>HR > 3.977 |
|                           | A3                 | 87 | 9              | 78             | Reference |              |                                       |                           |                           |
| A2 vs A3                  | A2                 | 61 | 14             | 47             | 2.278     | Medium       | HR < 0.788;<br>HR > 1.27              | HR < 0.49;<br>HR > 2.04   | HR < 0.292;<br>HR > 3.426 |
|                           | A3                 | 87 | 9              | 78             | Reference |              |                                       |                           |                           |
| B vs A3                   | A3                 | 87 | 9              | 78             | Reference |              |                                       |                           |                           |
|                           | B                  | 72 | 9              | 63             | 1.740     | Small        | HR < 0.803;<br>HR > 1.245             | HR < 0.514;<br>HR > 1.946 | HR < 0.312;<br>HR > 3.208 |
| A2 vs A1                  | A1                 | 44 | 8              | 36             | Reference |              |                                       |                           |                           |
|                           | A2                 | 61 | 14             | 47             | 2.196     | Medium       | HR < 0.839;<br>HR > 1.191             | HR < 0.575;<br>HR > 1.738 | HR < 0.367;<br>HR > 2.721 |
| B vs A1                   | A1                 | 44 | 8              | 36             | Reference |              |                                       |                           |                           |
|                           | B                  | 72 | 9              | 63             | 1.448     | Small        | HR < 0.848;<br>HR > 1.179             | HR < 0.592;<br>HR > 1.69  | HR < 0.383;<br>HR > 2.611 |
| A2 vs B                   | A2                 | 61 | 14             | 47             | 1.180     | No<br>effect | HR < 0.805;<br>HR > 1.242             | HR < 0.517;<br>HR > 1.934 | HR < 0.314;<br>HR > 3.18  |
|                           | B                  | 72 | 9              | 63             | Reference |              |                                       |                           |                           |
| Disease-Specific Survival |                    |    |                |                |           |              |                                       |                           |                           |
| A1 vs A3                  | A1                 | 43 | 5              | 38             | 3.725     | Medium       | HR < 0.751;<br>HR > 1.331             | HR < 0.439;<br>HR > 2.276 | HR < 0.251;<br>HR > 3.977 |
|                           | A3                 | 85 | 2              | 83             | Reference |              |                                       |                           |                           |
| A2 vs A3                  | A2                 | 58 | 4              | 54             | 5.078     | Large        | HR < 0.785;<br>HR > 1.274             | HR < 0.486;<br>HR > 2.057 | HR < 0.289;<br>HR > 3.466 |
|                           | A3                 | 85 | 2              | 83             | Reference |              |                                       |                           |                           |
| B vs A3                   | A3                 | 85 | 2              | 83             | Reference |              |                                       |                           |                           |
|                           | B                  | 72 | 5              | 67             | 4.668     | Large        | HR < 0.805;<br>HR > 1.242             | HR < 0.517;<br>HR > 1.935 | HR < 0.314;<br>HR > 3.181 |
| A2 vs A1                  | A1                 | 43 | 5              | 38             | Reference |              |                                       |                           |                           |
|                           | A2                 | 58 | 4              | 54             | 1.011     | No<br>effect | HR < 0.838;<br>HR > 1.193             | HR < 0.573;<br>HR > 1.746 | HR < 0.365;<br>HR > 2.741 |
| B vs A1                   | A1                 | 43 | 5              | 38             | Reference |              |                                       |                           |                           |
|                           | B                  | 72 | 5              | 67             | 1.015     | No<br>effect | HR < 0.849;<br>HR > 1.177             | HR < 0.594;<br>HR > 1.685 | HR < 0.385;<br>HR > 2.597 |
| A2 vs B                   | A2                 | 58 | 4              | 54             | 0.725     | Small        | HR < 0.801;<br>HR > 1.249             | HR < 0.51;<br>HR > 1.961  | HR < 0.309;<br>HR > 3.241 |
|                           | B                  | 72 | 5              | 67             | Reference |              |                                       |                           |                           |
| Disease-Free Interval     |                    |    |                |                |           |              |                                       |                           |                           |
| A1 vs A3                  | A1                 | 38 | 4              | 34             | 3.681     | Medium       | HR < 0.745;<br>HR > 1.342             | HR < 0.431;<br>HR > 2.32  | HR < 0.245;<br>HR > 4.079 |
|                           | A3                 | 79 | 2              | 77             | Reference |              |                                       |                           |                           |
| A2 vs A3                  | A2                 | 46 | 6              | 40             | 6.407     | Large        | HR < 0.768;<br>HR > 1.302             | HR < 0.462;<br>HR > 2.165 | HR < 0.269;<br>HR > 3.717 |

| Compari-<br>son           | Subpo-<br>pulation | N  | N <sub>e</sub> | N <sub>c</sub> | HR        | HR<br>effect | HR allocation adjusted critical value |                           |                           |  |
|---------------------------|--------------------|----|----------------|----------------|-----------|--------------|---------------------------------------|---------------------------|---------------------------|--|
|                           |                    |    |                |                |           |              | α = 0.1                               | α = 0.3                   | α = 0.5                   |  |
|                           |                    |    |                |                |           |              | small<br>effect                       | medium<br>effect          | large effect              |  |
|                           | A3                 | 79 | 2              | 77             | Reference |              |                                       |                           |                           |  |
| B vs A3                   | A3                 | 79 | 2              | 77             | Reference |              |                                       |                           |                           |  |
|                           | B                  | 64 | 5              | 59             | 4.291     | Large        | HR < 0.801;<br>HR > 1.248             | HR < 0.511;<br>HR > 1.958 | HR < 0.309;<br>HR > 3.234 |  |
| A2 vs A1                  | A1                 | 38 | 4              | 34             | Reference |              |                                       |                           |                           |  |
|                           | A2                 | 46 | 6              | 40             | 1.803     | Medium       | HR < 0.831;<br>HR > 1.203             | HR < 0.561;<br>HR > 1.783 | HR < 0.354;<br>HR > 2.826 |  |
| B vs A1                   | A1                 | 38 | 4              | 34             | Reference |              |                                       |                           |                           |  |
|                           | B                  | 64 | 5              | 59             | 1.094     | No<br>effect | HR < 0.85;<br>HR > 1.177              | HR < 0.594;<br>HR > 1.683 | HR < 0.386;<br>HR > 2.594 |  |
| A2 vs B                   | A2                 | 46 | 6              | 40             | 1.751     | Small        | HR < 0.79;<br>HR > 1.266              | HR < 0.494;<br>HR > 2.025 | HR < 0.295;<br>HR > 3.391 |  |
|                           | B                  | 64 | 5              | 59             | Reference |              |                                       |                           |                           |  |
| Progression-Free Interval |                    |    |                |                |           |              |                                       |                           |                           |  |
| A1 vs A3                  | A1                 | 44 | 7              | 37             | 2.361     | Medium       | HR < 0.751;<br>HR > 1.331             | HR < 0.439;<br>HR > 2.276 | HR < 0.251;<br>HR > 3.977 |  |
|                           | A3                 | 87 | 5              | 82             | Reference |              |                                       |                           |                           |  |
| A2 vs A3                  | A2                 | 61 | 9              | 52             | 3.056     | Medium       | HR < 0.788;<br>HR > 1.27              | HR < 0.49;<br>HR > 2.04   | HR < 0.292;<br>HR > 3.426 |  |
|                           | A3                 | 87 | 5              | 82             | Reference |              |                                       |                           |                           |  |
| B vs A3                   | A3                 | 87 | 5              | 82             | Reference |              |                                       |                           |                           |  |
|                           | B                  | 72 | 8              | 64             | 3.098     | Medium       | HR < 0.803;<br>HR > 1.245             | HR < 0.514;<br>HR > 1.946 | HR < 0.312;<br>HR > 3.208 |  |
| A2 vs A1                  | A1                 | 44 | 7              | 37             | Reference |              |                                       |                           |                           |  |
|                           | A2                 | 61 | 9              | 52             | 1.231     | Small        | HR < 0.839;<br>HR > 1.191             | HR < 0.575;<br>HR > 1.738 | HR < 0.367;<br>HR > 2.721 |  |
| B vs A1                   | A1                 | 44 | 7              | 37             | Reference |              |                                       |                           |                           |  |
|                           | B                  | 72 | 8              | 64             | 1.115     | No<br>effect | HR < 0.848;<br>HR > 1.179             | HR < 0.592;<br>HR > 1.69  | HR < 0.383;<br>HR > 2.611 |  |
| A2 vs B                   | A2                 | 61 | 9              | 52             | 1.062     | No<br>effect | HR < 0.805;<br>HR > 1.242             | HR < 0.517;<br>HR > 1.934 | HR < 0.314;<br>HR > 3.18  |  |
|                           | B                  | 72 | 8              | 64             | Reference |              |                                       |                           |                           |  |

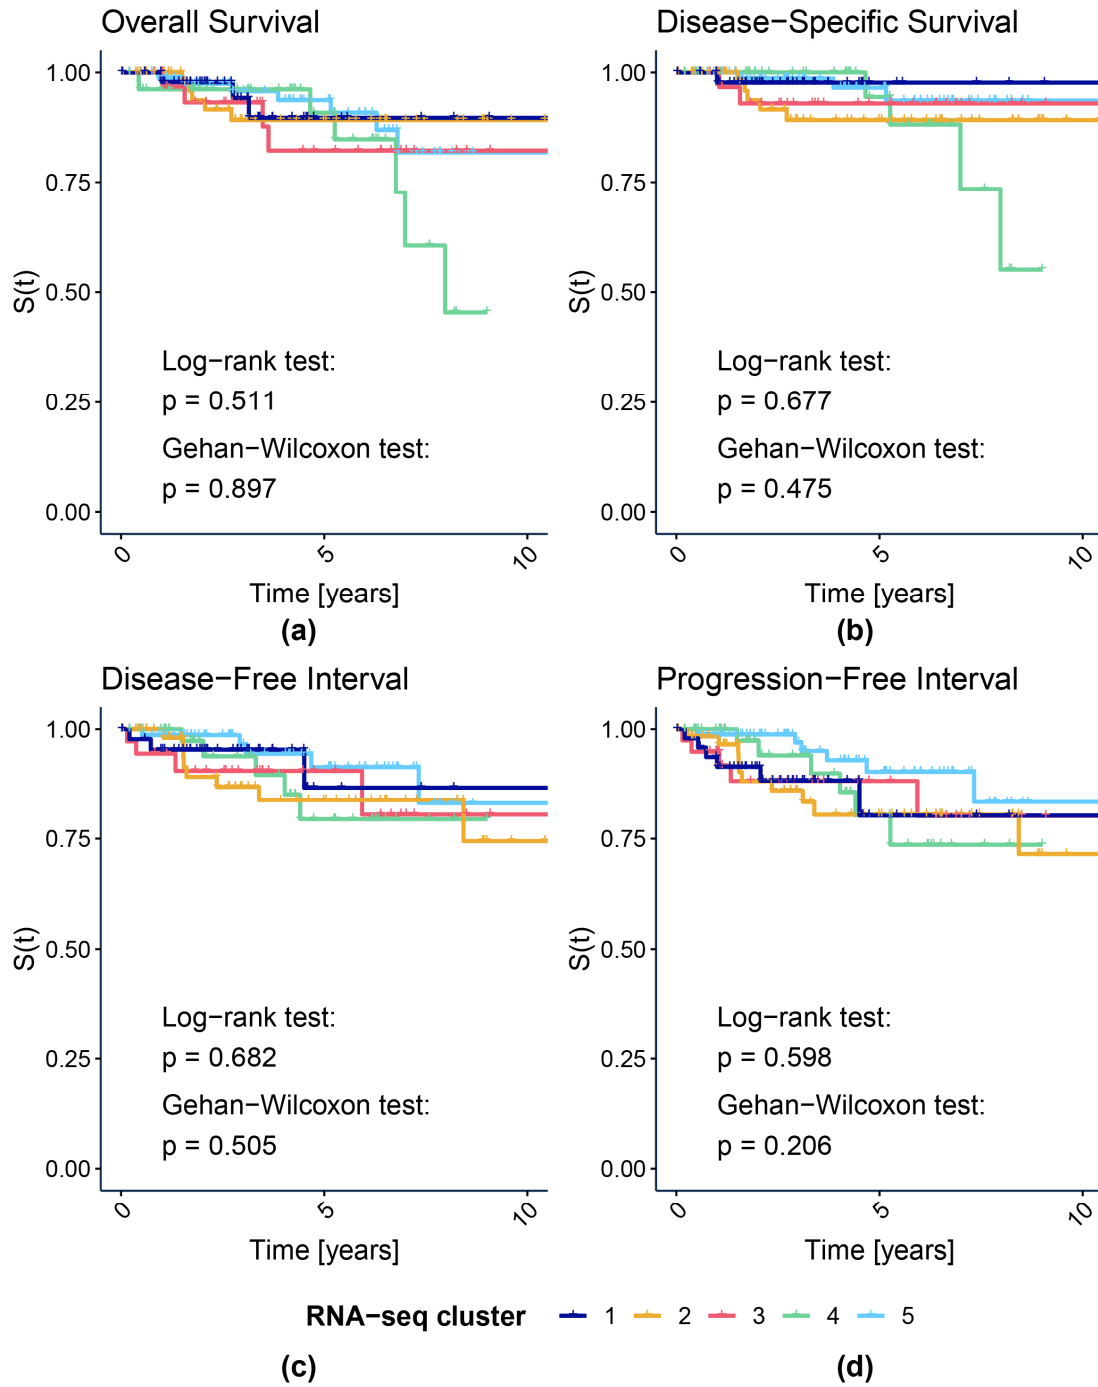

**Figure S6.** Kaplan-Meier survival curves of the clusters obtained based on the RNA sequencing results [30]. (a) Overall Survival; (b) Disease-Specific Survival; (c) Disease-Free Interval; (d) Progression-Free Interval.

**Table S10.** Association between categorical demographic and clinical factors and all subtypes identified with k-means clustering or based on PAM50 classifier.

| Feature                         | $\chi^2$ | p-value | Cramér's V | Cramér's V effect threshold |        |        |
|---------------------------------|----------|---------|------------|-----------------------------|--------|--------|
|                                 |          |         |            | Small                       | Medium | Large  |
| Proteomics-based subpopulations |          |         |            |                             |        |        |
| Race                            | 29.13    | 0.0155  | 0.1661     | 0.0577                      | 0.1732 | 0.2887 |
| Ethnicity                       | 1.14     | 0.9508  | 0.0609     | 0.1                         | 0.3    | 0.5    |
| AJCC Stage                      | 29.32    | 0.0146  | 0.1557     | 0.0577                      | 0.1732 | 0.2887 |

| Feature              | $\chi^2$ | p-value | Cramér's V | Cramér's V effect threshold |        |        |
|----------------------|----------|---------|------------|-----------------------------|--------|--------|
|                      |          |         |            | Small                       | Medium | Large  |
| AJCC Tumor           | 29.33    | 0.0146  | 0.1554     |                             |        |        |
| AJCC Node            | 28.79    | 0.0171  | 0.1538     |                             |        |        |
| AJCC Tumor Binarized | 18.72    | 0.0022  | 0.2150     | 0.1                         | 0.3    | 0.5    |
| AJCC Node Binarized  | 13.09    | 0.0225  | 0.1796     |                             |        |        |
| AJCC Metastasis      | 2.58     | 0.7649  | 0.0798     |                             |        |        |
| Radiotherapy         | 5.45     | 0.3634  | 0.1157     |                             |        |        |
| Chemotherapy         | 19.39    | 0.0016  | 0.2183     |                             |        |        |
| Hormone Therapy      | 69.76    | <0.0001 | 0.4140     |                             |        |        |
| PAM50-based subtypes |          |         |            |                             |        |        |
| Race                 | 34.68    | 0.0001  | 0.1812     | 0.0577                      | 0.1732 | 0.2887 |
| Ethnicity            | 4.09     | 0.2514  | 0.1155     | 0.1                         | 0.3    | 0.5    |
| AJCC Stage           | 20.13    | 0.0172  | 0.1290     | 0.0577                      | 0.1732 | 0.2887 |
| AJCC Tumor           | 24.28    | 0.0039  | 0.1414     |                             |        |        |
| AJCC Node            | 13.42    | 0.1447  | 0.1049     |                             |        |        |
| AJCC Tumor Binarized | 19.58    | 0.0002  | 0.2199     | 0.1                         | 0.3    | 0.5    |
| AJCC Node Binarized  | 8.28     | 0.0406  | 0.1428     |                             |        |        |
| AJCC Metastasis      | 2.78     | 0.4263  | 0.0829     |                             |        |        |
| Radiotherapy         | 1.18     | 0.7572  | 0.0539     |                             |        |        |
| Chemotherapy         | 8.83     | 0.0316  | 0.1473     |                             |        |        |
| Hormone Therapy      | 62.85    | <0.0001 | 0.3930     |                             |        |        |

Table cells with Cramér's V values are colored based on the effect size interpretation. Cramér's V effect interpretation thresholds were adjusted for the size of corresponding contingency tables.

**Table S11.** Summary of demographic and clinical categorical data.

| Feature           | Number of patients with records | Percentage of available records | Number of categories |
|-------------------|---------------------------------|---------------------------------|----------------------|
| Race              | 352                             | 86.49%                          | 4/3*                 |
| Ethnicity         | 307                             | 75.43%                          | 2                    |
| AJCC Cancer Stage | 403                             | 99.02%                          | 4                    |
| AJCC T            | 405                             | 99.51%                          | 4                    |
| AJCC T binarized  | 405                             | 99.51%                          | 2                    |
| AJCC N            | 406                             | 99.75%                          | 4                    |
| AJCC N binarized  | 406                             | 99.75%                          | 2                    |
| AJCC M            | 405                             | 99.51%                          | 2                    |

\* The number of race categories was equal to 4 for all subtypes considered and 3 for luminal or luminal A subpopulations only.



**Table S12.** The list of proteins with at least a large  $\eta^2$  effect between the identified four luminal subpopulations.

| Selected proteins   |
|---------------------|
| 14-3-3_beta-R-V     |
| 14-3-3_epsilon-M-C  |
| ACVRL1-R-C          |
| ADAR1-M-V           |
| Akt_pS473-R-V       |
| Akt_pT308-R-V       |
| Annexin-1-M-E       |
| Annexin_VII-M-V     |
| ASNS-R-V            |
| Bcl2A1-R-V          |
| beta-Catenin-R-V    |
| Bid-R-C             |
| BRD4-R-V            |
| c-Kit-R-V           |
| c-Met-M-E           |
| C-Raf-R-V           |
| Caspase-8-M-E       |
| Caveolin-1-R-V      |
| CD20-R-C            |
| cIAP-R-V            |
| Claudin-7-R-V       |
| COG3-R-V            |
| Collagen_VI-R-V     |
| Cyclin_B1-R-V       |
| Cyclin_D1-R-V       |
| DIRAS3-M-E          |
| DUSP4-R-V           |
| Dvl3-R-V            |
| E-Cadherin-R-V      |
| eEF2K-R-V           |
| EGFR_pY1173-R-V     |
| eIF4G-R-C           |
| ER-alpha-R-V        |
| ER-alpha_pS118-R-V  |
| ETS-1-R-V           |
| FoxM1-R-V           |
| FOXO3a-R-C          |
| GATA3-M-V           |
| GSK3-alpha-beta-M-V |
| Heregulin-R-V       |
| HSP70-R-C           |
| Jak2-R-V            |
| Ku80-R-C            |

| Selected proteins |
|-------------------|
| Lck-R-V           |
| mTOR-R-V          |
| MYH11-R-V         |
| N-Cadherin-R-V    |
| N-Ras-M-V         |
| NDRG1_pT346-R-V   |
| Notch1-R-V        |
| p70S6K-R-V        |
| PDCD4-R-C         |
| PDK1_pS241-R-V    |
| PKC-alpha-M-V     |
| PR-R-V            |
| PREX1-R-E         |
| Raptor-R-V        |
| Rb-M-E            |
| Rb_pS807_S811-R-V |
| RBM15-R-V         |
| S6-R-E            |
| SCD-M-V           |
| Src_pY527-R-V     |
| STAT3_pY705-R-V   |
| Stathmin-R-V      |

**Table S13.** The list of 40 proteins selected with the Gaussian-mixture-model-based feature filtration and with at least a large  $\eta^2$  effect between the identified four luminal subpopulations.

| Selected proteins |
|-------------------|
| ADAR1-M-V         |
| Akt_pS473-R-V     |
| Akt_pT308-R-V     |
| Annexin-1-M-E     |
| ASNS-R-V          |
| Bcl2A1-R-V        |
| beta-Catenin-R-V  |
| BRD4-R-V          |
| c-Kit-R-V         |
| Caveolin-1-R-V    |
| Claudin-7-R-V     |
| COG3-R-V          |
| Collagen_VI-R-V   |
| Cyclin_B1-R-V     |
| Cyclin_D1-R-V     |
| DUSP4-R-V         |
| E-Cadherin-R-V    |
| eEF2K-R-V         |

| Selected proteins   |
|---------------------|
| eIF4G-R-C           |
| ER-alpha-R-V        |
| ER-alpha_pS118-R-V  |
| FoxM1-R-V           |
| GATA3-M-V           |
| GSK3-alpha-beta-M-V |
| HSP70-R-C           |
| Ku80-R-C            |
| Lck-R-V             |
| mTOR-R-V            |
| MYH11-R-V           |
| NDRG1_pT346-R-V     |
| p70S6K-R-V          |
| PDCD4-R-C           |
| PR-R-V              |
| PREX1-R-E           |
| Rb_pS807_S811-R-V   |
| RBM15-R-V           |
| S6-R-E              |
| SCD-M-V             |
| Src_pY527-R-V       |
| STAT3_pY705-R-V     |
